# Supplementary material
Source: PubMed Central journal article supplement (PMC4811681)
Supplement: NIHMS753659-supplement-1.pdf [file NIHMS753659-supplement-1.pdf]

## Supplementary Note

### S1. Encoding of *HP* structural variants

*HP* structural variation was typed with droplet-digital PCR (ddPCR)<sup>1</sup> (**Supplementary Fig 4., Fig. 2b**) across four populations: CEU, TSI, IBS, YRI and was encoded as a series of bi-allelic variants in each reference panel. The structural boundary breakpoints (A-E) were coded as “1” to indicate the presence of the boundary and “0” to indicate its absence. The locations of boundaries A-E are indicated in **Supplementary Figure 4**. Additionally, each common *HP* subtype was encoded as a bi-allelic variant. The following table shows the encoding used for the four common *HP* structural haplotypes.

| Subtype            | HP1S | HP1F | HP2FS | HP2SS |
|--------------------|------|------|-------|-------|
| breakpoint_A       | 0    | 1    | 1     | 0     |
| breakpoint_B       | 0    | 1    | 0     | 0     |
| breakpoint_C       | 0    | 0    | 0     | 1     |
| breakpoint_D       | 0    | 0    | 1     | 1     |
| breakpoint_E (CNV) | 0    | 0    | 1     | 1     |
| HP1S               | 1    | 0    | 0     | 0     |
| HP1F               | 0    | 1    | 0     | 0     |
| HP2FS              | 0    | 0    | 1     | 0     |
| HP2SS              | 0    | 0    | 0     | 1     |

### S2. Evaluating the efficacy of imputation for *HP* structural variants

The above *HP* structural variation was combined with SNP genotype data from the 1000 Genomes Project<sup>2</sup> (Illumina OMNI array) and HapMap3<sup>3</sup> (Illumina 1M and Affymetrix 6.0 arrays). These panels used different subsets of the unrelated individuals typed in our study based on the availability of SNP genotypes in each data set.

Each SNP genotype dataset went through quality control prior to being combined with structural variants. SNPs in each panel with a genotyping rate below 90% or that defied Hardy-Weinberg Equilibrium ( $p < 0.001$ ) were excluded. Individuals with genotyping rate  $< 90\%$  were also omitted. SNPs assayed in HapMap3 from the region chr16:69628379-71655164 (hg18) were used, and SNPs assayed in the 1000 Genomes project with the Omni 2.5 SNP array from the region chr16:71088193-73097663 (hg19) were used. We discarded all SNP genotypes within the CNV region chr16:72090310-72093744 (hg19) from all panels and replaced these with the encoded structural alleles.

Reference panels were composed of unphased and unrelated individuals. Separate reference panels were created and tested for European and African populations due to differences in SNP haplotype backgrounds for *HP* subtypes (**Figure 4**).

To evaluate the utility of these reference panels as an imputation resource, we performed a series of “leave one out” trials. For each trial, we constructed a new panel of unphased markers where we set the genotypes for the nine markers for the structural alleles to “missing” for a single individual. We then used Beagle to phase the resulting panel and impute the missing markers. Beagle was run with default parameters plus two additional settings ( $n_{\text{samples}}=15$ ,  $n_{\text{iterations}}=15$ ). European samples were also run with the  $\text{maxwindow}=2000$  setting as the best tag SNPs for the HP2SS haplotype are far away. By forcing Beagle to re-phase the panel in each iteration, we avoided any potential problems with data from the left-out individual impacting the phasing of the reference panel. The results of this analysis are shown in **Table 1** and **Supplementary Tables 2-5**.

### **S3. Imputation of *HP* structural variation into cholesterol cohorts**

A phased reference panel composed of 1000 Genomes and HapMap3 SNP genotypes from the Illumina OMNI, Illumina 1M, and Affymetrix 6.0 arrays, (QC discussed in S1) and *HP* structural alleles (based on ddPCR) was created for imputation. Only the CEU, TSI and IBS populations were used for the reference panel. In the case of disagreements among SNP calls for an individual between the arrays, the Illumina OMNI genotype was used. The imputation into the cholesterol cohorts (below) was run with default Beagle parameters plus two additional settings (nsamples=25, niterations=50). In addition to the encoded *HP* structural variants described above, variants were added to the reference panel to indicate the haplotype background of each allele (A, B, C, D as in **Fig. 1**).

#### **S4. Description of cholesterol cohorts used in the association study**

##### **Study Cohorts**

The influence of *HP* structural alleles on lipid traits was assessed in six cohorts retrieved from dbGaP (see Acknowledgements): ARIC, CHS, CARDIA, FUSION, MESA and NFBC66. Individuals from each cohort were selected for measurement of lipid traits: TC, LDL, HDL, and TRIGS, and availability of relevant covariates: type 2 diabetes diagnosis, cholesterol lowering medication/statin use, age and gender. Analysis were performed using baseline lipid measurements for cohorts with longitudinal follow-up.

##### Atherosclerosis Risk in Communities (ARIC)

The participants of ARIC<sup>4</sup> were recruited from 4 communities beginning in 1987, Forsyth County, NC; Jackson, MS; the northwest suburbs of Minneapolis, MN; and Washington County, MD [dbGaP phs000280.v3.p1]. Whole genome genotyping was performed using the Affymetrix 6.0 platform and genotype calling was performed using the Birdseed calling algorithm<sup>5</sup>. 8,592 European-American subjects were included in the analyses.

##### Cardiovascular Health Study (CHS)

The participants of CHS<sup>6</sup> were recruited from Forsyth County, NC; Sacramento County, CA; Washington County, MD; and Pittsburgh, PA [dbGaP phs000287.v4.p1]. Whole genome genotyping was performed using the Illumina

HumanCNV370v1 platform and genotype calling was performed using Illumina GenomeStudio software. 3,220 European-Americans subjects were used for the analyses.

#### Coronary Artery Risk Development in Young Adults (CARDIA)

The participants of CARDIA<sup>7</sup>

were recruited from four communities in the United States: Birmingham, AL; Chicago, IL; Minneapolis, MN; and Oakland, CA [dbGaP phs000285.v3.p2].

Whole genome genotyping was performed using the Affymetrix 6.0 platform and genotype calling was performed using Birdseed calling algorithm. 1,168 European-Americans subjects were used for the analyses.

#### The Finland-United States Investigation of NIDDM Genetics (FUSION)

The participants of the FUSION<sup>8</sup> were recruited from throughout Finland as part of a type 2 diabetes case-control research studies. Whole genome genotyping was performed using the Illumina HumanHap300v1.1 platform. Analyses were performed by type 2 diabetes case-control status of 1,687 Finnish European subjects, consisting of 910 with diabetes and 777 without evidence of diabetes.

#### Multi-Ethnic Study of Atherosclerosis (MESA)

The participants of the MESA<sup>9</sup> were recruited from six regions in the United States: Baltimore City and Baltimore County, Maryland; Chicago, Illinois; Forsyth County, North Carolina; Los Angeles County, California; New York, New York; and St. Paul, Minnesota.

Whole genome genotyping was performed using the Affymetrix 6.0 platform and 2,358 European-American subjects were used for the analyses.

#### Northern Finland Birth Cohort 1966 (NFBC1966)

The participants of the NFBC66<sup>10</sup> were recruited among women at maternity health clinics in northern Finland in 1966. Whole genome genotyping was performed using the HumanCNV370-Quadv3 core platform. A total of 5,263 Finnish European ancestry subjects were used for the analyses.

| Cohort              | Country of Origin | N Samples | Mean Age, years $\pm$ SD | Sex, % Female | Total Cholesterol (TC), mg/dL $\pm$ SD | LDL cholesterol, mg/dL $\pm$ SD | HDL Cholesterol, mg/dL $\pm$ SD | Triglycerides (TC), mg/dL $\pm$ SD | Statin Use (%) | T2D: N (%) |
|---------------------|-------------------|-----------|--------------------------|---------------|----------------------------------------|---------------------------------|---------------------------------|------------------------------------|----------------|------------|
| ARIC                | US                | 8592      | 54.33 $\pm$ 5.68         | 4344 (51.7%)  | 214.8 $\pm$ 40.1                       | 137.7 $\pm$ 37.2                | 50.2 $\pm$ 16.5                 | 137.6 $\pm$ 89.8                   | 300 (3.6%)     | 702 (8.4%) |
| CARDIA              | US                | 1168      | 25.6 $\pm$ 3.3           | 611 (51.3%)   | 175.7 $\pm$ 32.0                       | 108.2 $\pm$ 29.8                | 51.9 $\pm$ 13.0                 | 78.1 $\pm$ 56.5                    | 0 (0%)         | 8 (0.7%)   |
| CHS                 | US                | 3220      | 72.3 $\pm$ 5.4           | 1937 (60.2%)  | 216.0 $\pm$ 39.0                       | 133.6 $\pm$ 35.5                | 55.0 $\pm$ 15.9                 | 140.6 $\pm$ 74.6                   | 140 (4.4%)     | 677 (21%)  |
| FUSION T2D Cases    | Finland           | 910       | 62.8 (7.6)               | 382 (42.0%)   | 221.2 $\pm$ 48.5                       | 137.9 $\pm$ 39.5                | 45.3 $\pm$ 12.9                 | 201.9 $\pm$ 159.6                  | n/a            | 910 (100%) |
| FUSION T2D Controls | Finland           | 777       | 62.7 (7.4)               | 369 (47.5.0%) | 223.3 $\pm$ 37.6                       | 141.9 $\pm$ 34.3                | 58.1 $\pm$ 16.3                 | 119.3 $\pm$ 60.0                   | n/a            | 0 (0%)     |
| MESA                | US                | 2358      | 62.7 $\pm$ 10.2          | 1320 (52.3%)  | 196.0 $\pm$ 35.3                       | 117.1 $\pm$ 30.3                | 52.4 $\pm$ 15.8                 | 133.0 $\pm$ 90.1                   | 462 (18.3%)    | 151 (6.0%) |
| NFBC66              | Finland           | 5263      | 31.0 $\pm$ 0             | 2610 (52.7%)  | 196.7 $\pm$ 39.01                      | 116.5 $\pm$ 34.5                | 60.4 $\pm$ 14.8                 | 105.2 $\pm$ 64.0                   | n/a            | 10 (0.2%)  |

## Genotype Quality control and 1000 Genomes Imputation

A stringent quality control protocol was applied to study genome wide genotype data retrieved from dbGaP. Samples that had ambiguous or incorrect gender were filtered out. SNPs that have > 5% missing rate were filtered out. Samples that have > 2% missing SNPs were removed. SNPs that have minor allele frequencies < 1% were dropped. Samples that have extreme heterozygosity ( $\pm$  4 standard deviations) were removed. The SNP annotations for chromosome and base-pair positions were set to the coordinates of hg19 (GRCh37) using the liftOver tool<sup>11</sup>. Pairwise IBD/IBS were calculated and individuals that have excessive matching with other individuals. For all other cohorts, the threshold was set at PI\_HAT > 0.05. Principal components analysis was performed using SMARTPCA<sup>12</sup> and each study was projected onto HapMap version 3<sup>13</sup>. Samples that do not cluster with the expected HapMap population were removed. SNPs that have excessive plate-effects ( $P < 1 \times 10^{-7}$ ) were dropped. SNPs that have excessive deviation from Hardy-Weinberg equilibrium ( $P < 1 \times 10^{-7}$ ) were also dropped. The QC protocol was performed using PLINK<sup>14</sup> (v1.07) and custom R and PERL scripts.

The imputation for all cohorts was performed with a 1000 Genomes version 1 phase 3 reference panel containing 379 Europeans, 246 Africans and African-Americans, 286 Asians and 181 Latin Americans. The imputation panel consists of approximately 22 million variants (SNPs and indels). For the X-chromosome, only the non-pseudo autosomal region was imputed. The phasing and imputation

were done separately for males and females for the X-chromosome. The genotypes were phased using SHAPEIT2<sup>15</sup> (version 2.644) and imputed using IMPUTE2<sup>16</sup> (version 2.3).

| Cohort | Ancestry     | Array      |               | N        |         | Genome   |
|--------|--------------|------------|---------------|----------|---------|----------|
|        |              | Vender     | Array         | Subjects | N SNPs  | Build    |
| ARIC   | EA           | Affymetrix | Affy6.0       | 8,592    | 595,125 | hg19 1k+ |
| CARDIA | EA           | Affymetrix | Affy6.0       | 1,168    | 588,503 | hg19 1k+ |
| CHS    | EA           | Illumina   | HumanCNV370v1 | 3,220    | 310,108 | hg19 1k+ |
| FUSION | EA (Finnish) | Illumina   | HumanHap300v1 | 1,687    | 312,032 | hg19 1k+ |
| MESA   | EA           | Affymetrix | Affy6.0       | 2,358    | 700,473 | hg19 1k+ |
| NFBC66 | EA (Finnish) | Illumina   | HumanCNV370v1 | 5,263    | 328,401 | hg19 1k+ |

### S5. Association of *HP* structural variants to cholesterol levels

The association between imputed *HP* structural variants and the four lipids traits (total cholesterol (TC), low-density lipoprotein (LDL, high density lipoprotein (HDL), and triglycerides (TRIGS)) was performed in 6 studies of 22,288 individuals of European ancestry. Each lipid trait was regressed on age and gender, and inverse-normal transformed prior to analysis. Linear regression was performed to test the association between imputed structural variants or SNPs in the locus and lipid trait, assuming an additive genetic model using PLINK (v1.07). The imputed *HP* structural variants and genotypes were analyzed as dosages to account for imputation uncertainty, poorly imputed variants discarded (INFO<0.4). All analyses were adjusted for 10 study specific principal components. Study specific results were combined inverse-variance fixed effects meta-analysis method implemented in METAL<sup>17</sup>. Conditional analyses were performed for *HP* structural variants and SNPs in the region by adjusting for HP2 and the top lipid GWAS signal. Additional conditional analysis were performed for the four HP2 SNP-haplotypes adjusted each other and with inclusion of the top lipid GWAS signal (rs2000999). Sensitivity and specificity analyses were

performed to assess the influence of type 2 diabetes (adjustment or removal of samples) and cholesterol lowering/statin medication use (recalculating values, adjustment or removal of samples). All analyses were performed using baseline lipid measurements for cohorts with longitudinal follow-up.

## Supplementary Tables

**Supplementary Table 1. Neandertal, Denisova and ancient Ethiopian coverage of HP2FS haplotype.** This table lists the position of each base that defines the HP2FS haplotype along with the number of mapped reads and uniquely mapped reads for the neandertal<sup>18</sup> and denisova<sup>19</sup> high-coverage genomes. Only uniquely mapped reads are shown for the ancient Ethiopian (Mota)<sup>20</sup> as the published bam file was filtered for a mapping quality of 30. The specific variant and CNV copy for each base is indicated on the right side of the table. Parts of the *HPR* gene conversion region in the *HP* gene lack uniquely-mapped reads due to high homology with the *HPR* gene.

(continues on next page)

|            |          |      | Denisova              |              | Neandertal            |              | Mota<br>(ancient Ethiopian) | Variant                          | CNV copy    |                                  |  |
|------------|----------|------|-----------------------|--------------|-----------------------|--------------|-----------------------------|----------------------------------|-------------|----------------------------------|--|
| Chromosome | Position | Base | Uniquely mapped reads | Mapped reads | Uniquely mapped reads | Mapped reads | Uniquely mapped reads       |                                  |             |                                  |  |
| chr16      | 72091102 | T    | 22                    | 33           | 21                    | 29           | 6                           | HPR gene conversion region       | HP2FS-Left  |                                  |  |
| chr16      | 72091103 | G    | 23                    | 35           | 18                    | 26           | 6                           |                                  |             |                                  |  |
| chr16      | 72091168 | C    | 23                    | 27           | 43                    | 51           | 0                           |                                  |             |                                  |  |
| chr16      | 72091169 | T    | 22                    | 27           | 42                    | 51           | 0                           |                                  |             |                                  |  |
| chr16      | 72091178 | G    | 18                    | 25           | 35                    | 55           | 0                           |                                  |             |                                  |  |
| chr16      | 72091180 | C    | 17                    | 25           | 34                    | 57           | 0                           |                                  |             |                                  |  |
| chr16      | 72091183 | C    | 17                    | 25           | 31                    | 57           | 0                           |                                  |             |                                  |  |
| chr16      | 72091185 | T    | 16                    | 24           | 29                    | 57           | 0                           |                                  |             |                                  |  |
| chr16      | 72091191 | C    | 13                    | 28           | 24                    | 56           | 0                           |                                  |             |                                  |  |
| chr16      | 72091192 | T    | 12                    | 27           | 24                    | 57           | 0                           |                                  |             |                                  |  |
| chr16      | 72091195 | T    | 10                    | 25           | 22                    | 56           | 0                           |                                  |             |                                  |  |
| chr16      | 72091201 | T    | 7                     | 22           | 18                    | 59           | 0                           |                                  |             |                                  |  |
| chr16      | 72091207 | A    | 6                     | 21           | 16                    | 59           | 0                           |                                  |             |                                  |  |
| chr16      | 72091216 | C    | 4                     | 22           | 12                    | 61           | 0                           |                                  |             |                                  |  |
| chr16      | 72091238 | T    | 1                     | 30           | 6                     | 65           | 0                           |                                  |             |                                  |  |
| chr16      | 72091245 | G    | 1                     | 36           | 4                     | 64           | 0                           |                                  |             |                                  |  |
| chr16      | 72091246 | C    | 1                     | 37           | 4                     | 65           | 0                           |                                  |             |                                  |  |
| chr16      | 72091258 | T    | 0                     | 40           | 3                     | 68           | 0                           |                                  |             |                                  |  |
| chr16      | 72091271 | T    | 0                     | 43           | 3                     | 64           | 0                           |                                  |             |                                  |  |
| chr16      | 72091295 | A    | 0                     | 35           | 2                     | 61           | 0                           |                                  |             |                                  |  |
| chr16      | 72091307 | T    | 0                     | 32           | 0                     | 66           | 0                           |                                  |             |                                  |  |
| chr16      | 72091308 | G    | 0                     | 32           | 0                     | 63           | 0                           |                                  |             |                                  |  |
| chr16      | 72091311 | A    | 0                     | 31           | 0                     | 68           | 0                           |                                  |             |                                  |  |
| chr16      | 72091382 | G    | 0                     | 19           | 0                     | 40           | 0                           |                                  |             |                                  |  |
| chr16      | 72091383 | A    | 0                     | 20           | 0                     | 41           | 0                           |                                  |             |                                  |  |
| chr16      | 72091384 | G    | 0                     | 20           | 0                     | 39           | 0                           |                                  |             |                                  |  |
| chr16      | 72091385 | C    | 0                     | 19           | 0                     | 40           | 0                           |                                  |             |                                  |  |
| chr16      | 72091386 | A    | 0                     | 21           | 0                     | 43           | 0                           |                                  |             |                                  |  |
| chr16      | 72091387 | C    | 0                     | 21           | 0                     | 43           | 0                           |                                  |             |                                  |  |
| chr16      | 72091388 | T    | 0                     | 21           | 0                     | 47           | 0                           |                                  |             |                                  |  |
| chr16      | 72091565 | G    | 17                    | 21           | 35                    | 38           | 2                           | Highly diverged region<br>Form L |             |                                  |  |
| chr16      | 72091593 | C    | 20                    | 22           | 46                    | 48           | 4                           |                                  |             |                                  |  |
| chr16      | 72091598 | G    | 21                    | 22           | 47                    | 48           | 4                           |                                  |             |                                  |  |
| chr16      | 72091599 | G    | 21                    | 22           | 48                    | 49           | 4                           |                                  |             |                                  |  |
| chr16      | 72091602 | C    | 21                    | 21           | 48                    | 49           | 5                           |                                  |             |                                  |  |
| chr16      | 72091603 | T    | 19                    | 19           | 49                    | 50           | 5                           |                                  |             |                                  |  |
| chr16      | 72091614 | C    | 21                    | 21           | 50                    | 51           | 4                           |                                  |             |                                  |  |
| chr16      | 72091648 | A    | 29                    | 29           | 46                    | 47           | 3                           |                                  |             |                                  |  |
| chr16      | 72091808 | C    | 34                    | 34           | 49                    | 50           | 13                          |                                  |             |                                  |  |
| chr16      | 72091819 | A    | 30                    | 30           | 51                    | 52           | 13                          |                                  |             |                                  |  |
| chr16      | 72092029 | C    | 18                    | 18           | 64                    | 65           | 17                          | HP2<br>breakpoint                |             |                                  |  |
| chr16      | 72092030 | G    | 18                    | 18           | 62                    | 63           | 17                          |                                  |             |                                  |  |
| chr16      | 72092031 | C    | 18                    | 18           | 62                    | 62           | 17                          |                                  |             |                                  |  |
| chr16      | 72092032 | G    | 18                    | 18           | 58                    | 58           | 17                          |                                  |             |                                  |  |
| chr16      | 72092033 | A    | 18                    | 18           | 60                    | 60           | 17                          |                                  |             |                                  |  |
| chr16      | 72092034 | G    | 18                    | 18           | 60                    | 60           | 17                          |                                  |             |                                  |  |
| chr16      | 72092826 | C    | 23                    | 23           | 46                    | 46           | 19                          | Ancestral Hp bases               | HP2FS-Right |                                  |  |
| chr16      | 72092827 | A    | 23                    | 23           | 45                    | 45           | 19                          |                                  |             |                                  |  |
| chr16      | 72092892 | T    | 25                    | 25           | 48                    | 48           | 18                          |                                  |             |                                  |  |
| chr16      | 72092893 | C    | 23                    | 23           | 48                    | 48           | 19                          |                                  |             |                                  |  |
| chr16      | 72092902 | T    | 25                    | 25           | 48                    | 48           | 18                          |                                  |             |                                  |  |
| chr16      | 72092904 | T    | 24                    | 24           | 48                    | 48           | 18                          |                                  |             |                                  |  |
| chr16      | 72092907 | T    | 24                    | 24           | 50                    | 50           | 18                          |                                  |             |                                  |  |
| chr16      | 72092909 | C    | 23                    | 23           | 50                    | 50           | 17                          |                                  |             |                                  |  |
| chr16      | 72092917 | C    | 26                    | 26           | 48                    | 48           | 16                          |                                  |             |                                  |  |
| chr16      | 72092923 | C    | 25                    | 25           | 51                    | 51           | 16                          |                                  |             |                                  |  |
| chr16      | 72092929 | G    | 25                    | 25           | 51                    | 51           | 19                          |                                  |             |                                  |  |
| chr16      | 72092938 | T    | 21                    | 21           | 61                    | 61           | 20                          |                                  |             |                                  |  |
| chr16      | 72092960 | A    | 22                    | 22           | 69                    | 69           | 18                          |                                  |             |                                  |  |
| chr16      | 72092967 | C    | 22                    | 22           | 68                    | 68           | 24                          |                                  |             |                                  |  |
| chr16      | 72092968 | T    | 24                    | 24           | 70                    | 70           | 24                          |                                  |             |                                  |  |
| chr16      | 72092980 | C    | 28                    | 28           | 68                    | 68           | 21                          |                                  |             |                                  |  |
| chr16      | 72092993 | C    | 29                    | 29           | 70                    | 70           | 17                          |                                  |             |                                  |  |
| chr16      | 72093017 | G    | 28                    | 28           | 56                    | 56           | 11                          |                                  |             |                                  |  |
| chr16      | 72093029 | A    | 35                    | 35           | 58                    | 58           | 10                          |                                  |             |                                  |  |
| chr16      | 72093030 | C    | 35                    | 35           | 58                    | 58           | 9                           |                                  |             |                                  |  |
| chr16      | 72093026 | A    | 36                    | 36           | 60                    | 60           | 9                           |                                  |             |                                  |  |
| chr16      | 72093097 | G    | 17                    | 22           | 34                    | 42           | 7                           |                                  |             |                                  |  |
| chr16      | 72093280 | A    | 29                    | 30           | 40                    | 40           | 9                           |                                  |             | Highly diverged region<br>Form R |  |
| chr16      | 72093308 | T    | 33                    | 33           | 39                    | 39           | 13                          |                                  |             |                                  |  |
| chr16      | 72093313 | T    | 31                    | 31           | 37                    | 37           | 14                          |                                  |             |                                  |  |
| chr16      | 72093314 | A    | 31                    | 31           | 39                    | 39           | 14                          |                                  |             |                                  |  |
| chr16      | 72093317 | T    | 33                    | 33           | 41                    | 41           | 16                          |                                  |             |                                  |  |
| chr16      | 72093318 | C    | 34                    | 34           | 41                    | 41           | 15                          |                                  |             |                                  |  |
| chr16      | 72093329 | T    | 28                    | 28           | 38                    | 38           | 11                          |                                  |             |                                  |  |
| chr16      | 72093363 | G    | 13                    | 25           | 25                    | 35           | 6                           |                                  |             |                                  |  |
| chr16      | 72093523 | A    | 38                    | 38           | 37                    | 37           | 11                          |                                  |             |                                  |  |
| chr16      | 72093534 | G    | 33                    | 33           | 41                    | 41           | 11                          |                                  |             |                                  |  |



**Supplementary Table 2. Imputation and tag SNP correlations for structural variants using the Illumina Omni2.5 array.** The correlation between SNPs and HP1/HP2 is increased in Africans due to a high-frequency recombinant haplotype (Supplementary Figure 8).

|             | Africans (YRI)       |                   |
|-------------|----------------------|-------------------|
| Structure   | Imputation ( $r^2$ ) | Tag SNP ( $r^2$ ) |
| HP1S        | 0.96                 | 0.96 rs115558487  |
| HP1F        | 0.92                 | 0.82 rs7198572    |
| HP2FS       | 0.90                 | 0.76 rs11075922   |
| HP2SS       | NA                   | NA                |
| HP1 vs. HP2 | 0.90                 | 0.76 rs11075922   |

**Supplementary Table 3. Imputation and tag SNP correlations for structural variants using the HapMap 3 SNPs.**

|             | HapMap 3             |                   |                      |                   |
|-------------|----------------------|-------------------|----------------------|-------------------|
| Population  | Africans (YRI)       |                   | European (CEU, TSI)  |                   |
|             | Imputation ( $r^2$ ) | Tag SNP ( $r^2$ ) | Imputation ( $r^2$ ) | Tag SNP ( $r^2$ ) |
| HP1S        | 1                    | 1 rs16973703      | 0.90                 | 0.79 rs217181     |
| HP1F        | 0.94                 | 0.86 rs12928732   | 0.92                 | 0.79 rs9302635    |
| HP2FS       | 0.94                 | 0.82 rs6499562    | 0.83                 | 0.39 rs217181     |
| HP2SS       | NA                   | NA                | 0.51                 | 0.28 rs1290842    |
| HP1 vs. HP2 | 0.94                 | 0.82 rs6499562    | 0.88                 | 0.42 rs217181     |

**Supplementary Table 4. Imputation and tag SNP correlations for structural variants using the Illumina 1M SNPs.**

|             | Illumina 1M          |                   |                      |                   |
|-------------|----------------------|-------------------|----------------------|-------------------|
| Population  | Africans (YRI)       |                   | European (CEU, TSI)  |                   |
|             | Imputation ( $r^2$ ) | Tag SNP ( $r^2$ ) | Imputation ( $r^2$ ) | Tag SNP ( $r^2$ ) |
| HP1S        | 0.97                 | 0.73 rs13331191   | 0.88                 | 0.34 rs4788597    |
| HP1F        | 0.90                 | 0.86 rs12928732   | 0.92                 | 0.79 rs9302635    |
| HP2FS       | 0.92                 | 0.82 rs6499562    | 0.83                 | 0.24 rs9302635    |
| HP2SS       | NA                   | NA                | 0.34                 | 0.28 rs12920842   |
| HP1 vs. HP2 | 0.92                 | 0.82 rs6499562    | 0.86                 | 0.28 rs9302635    |

**Supplementary Table 5. Imputation and tag SNP correlations for structural variants using the Affymetrix 6.0 SNPs.**

|             | Affy 6.0             |                   |                      |                   |
|-------------|----------------------|-------------------|----------------------|-------------------|
| Population  | Africans (YRI)       |                   | European (CEU, TSI)  |                   |
|             | Imputation ( $r^2$ ) | Tag SNP ( $r^2$ ) | Imputation ( $r^2$ ) | Tag SNP ( $r^2$ ) |
| HP1S        | 1                    | 0.94 rs16973636   | 0.93                 | 0.79 rs217181     |
| HP1F        | 0.92                 | 0.74 rs16970661   | 0.88                 | 0.79 rs9302635    |
| HP2FS       | 0.92                 | 0.8 rs8052408     | 0.85                 | 0.39 rs217181     |
| HP2SS       | NA                   | NA                | 0.34                 | 0.23 rs12921986   |
| HP1 vs. HP2 | 0.92                 | 0.8 rs8052408     | 0.88                 | 0.42 rs217181     |

**Supplementary Table 6. Association of HP2 to total cholesterol levels and LDL cholesterol levels with different covariates.**

| Trait | MarkerName | A1 | A2 | Frequency | Effect | StdErr | P-value  | Note                                       |
|-------|------------|----|----|-----------|--------|--------|----------|--------------------------------------------|
| TC    | HP2        | a  | b  | 0.6387    | 0.072  | 0.011  | 2.82E-11 | Raw value in mg (inverse-normal)           |
| TC    | HP2        | a  | b  | 0.6386    | 0.072  | 0.011  | 2.28E-11 | Cond on statin use                         |
| TC    | HP2        | a  | b  | 0.6383    | 0.072  | 0.011  | 2.69E-11 | Cond on T2D stat                           |
| TC    | HP2        | a  | b  | 0.6383    | 0.072  | 0.011  | 2.06E-11 | Cond on statin + T2D stat                  |
| TC    | HP2        | a  | b  | 0.6387    | 0.071  | 0.011  | 4.47E-11 | Lipid val adj for statin Use               |
| TC    | HP2        | a  | b  | 0.6383    | 0.072  | 0.011  | 3.65E-11 | Lipid val adj for statin Use cond T2D Stat |
| TC    | HP2        | a  | b  | 0.6384    | 0.074  | 0.011  | 2.19E-11 | Remove subjects on statin meds             |
| TC    | HP2        | a  | b  | 0.6419    | 0.076  | 0.012  | 4.25E-11 | Remove subjects with T2D                   |
| TC    | HP2        | a  | b  | 0.6415    | 0.079  | 0.012  | 1.02E-11 | Remove subjects with T2D or statin use     |

| Trait | MarkerName | A1 | A2 | Freq1  | Effect | StdErr | P-value  | Note                                       |
|-------|------------|----|----|--------|--------|--------|----------|--------------------------------------------|
| LDL   | HP2        | a  | b  | 0.6393 | 0.064  | 0.011  | 4.26E-09 | Raw value in mg (inverse-normal)           |
| LDL   | HP2        | a  | b  | 0.6393 | 0.064  | 0.011  | 3.84E-09 | Cond on statin use                         |
| LDL   | HP2        | a  | b  | 0.6389 | 0.063  | 0.011  | 6.26E-09 | Cond on T2D stat                           |
| LDL   | HP2        | a  | b  | 0.6389 | 0.063  | 0.011  | 5.52E-09 | Cond on statin + T2D stat                  |
| LDL   | HP2        | a  | b  | 0.6393 | 0.064  | 0.011  | 4.90E-09 | Lipid val adj for statin Use               |
| LDL   | HP2        | a  | b  | 0.639  | 0.064  | 0.011  | 6.22E-09 | Lipid val adj for statin Use cond T2D Stat |
| LDL   | HP2        | a  | b  | 0.639  | 0.067  | 0.011  | 1.73E-09 | Remove subjects on statin meds             |
| LDL   | HP2        | a  | b  | 0.642  | 0.065  | 0.012  | 2.31E-08 | Remove subjects with T2D                   |
| LDL   | HP2        | a  | b  | 0.6417 | 0.069  | 0.012  | 4.10E-09 | Remove subjects with T2D or statin use     |

| Trait | MarkerName | A1 | A2 | Freq1  | Effect | StdErr | P-value  | Note                                       |
|-------|------------|----|----|--------|--------|--------|----------|--------------------------------------------|
| HDL   | HP2        | a  | b  | 0.6386 | 0.006  | 0.011  | 5.70E-01 | Raw value in mg (inverse-normal)           |
| HDL   | HP2        | a  | b  | 0.6385 | 0.006  | 0.011  | 5.54E-01 | Cond on statin use                         |
| HDL   | HP2        | a  | b  | 0.638  | 0.005  | 0.011  | 6.66E-01 | Cond on T2D stat                           |
| HDL   | HP2        | a  | b  | 0.6379 | 0.005  | 0.011  | 6.44E-01 | Cond on statin + T2D stat                  |
| HDL   | HP2        | a  | b  | 0.6386 | 0.006  | 0.011  | 5.70E-01 | Lipid val adj for statin Use               |
| HDL   | HP2        | a  | b  | 0.638  | 0.005  | 0.011  | 6.66E-01 | Lipid val adj for statin Use cond T2D Stat |

|     |     |   |   |        |       |       |          |                                        |
|-----|-----|---|---|--------|-------|-------|----------|----------------------------------------|
| HDL | HP2 | a | b | 0.6383 | 0.006 | 0.011 | 5.63E-01 | Remove subjects on statin meds         |
| HDL | HP2 | a | b | 0.6418 | 0.002 | 0.012 | 8.46E-01 | Remove subjects with T2D               |
| HDL | HP2 | a | b | 0.6414 | 0.000 | 0.012 | 9.81E-01 | Remove subjects with T2D or statin use |

| Trait | MarkerName | A1 | A2 | Freq1  | Effect | StdErr | P-value  | Note                                       |
|-------|------------|----|----|--------|--------|--------|----------|--------------------------------------------|
| TG    | HP2        | a  | b  | 0.6386 | 0.033  | 0.011  | 2.25E-03 | Raw value in mg (inverse-normal)           |
| TG    | HP2        | a  | b  | 0.6385 | 0.033  | 0.011  | 2.38E-03 | Cond on statin use                         |
| TG    | HP2        | a  | b  | 0.6379 | 0.036  | 0.011  | 7.81E-04 | Cond on T2D stat                           |
| TG    | HP2        | a  | b  | 0.6379 | 0.036  | 0.011  | 8.76E-04 | Cond on statin + T2D stat                  |
| TG    | HP2        | a  | b  | 0.6386 | 0.033  | 0.011  | 2.25E-03 | Lipid val adj for statin Use               |
| TG    | HP2        | a  | b  | 0.6379 | 0.036  | 0.011  | 7.81E-04 | Lipid val adj for statin Use cond T2D Stat |
| TG    | HP2        | a  | b  | 0.6384 | 0.033  | 0.011  | 2.74E-03 | Remove subjects on statin meds             |
| TG    | HP2        | a  | b  | 0.6418 | 0.043  | 0.012  | 2.28E-04 | Remove subjects with T2D                   |
| TG    | HP2        | a  | b  | 0.6415 | 0.044  | 0.012  | 1.86E-04 | Remove subjects with T2D or statin use     |

**Supplementary Table 7.** LD between rs2000999 and the CNV on each SNP haplotype background

| Haplotype             | LD with rs2000999 ( $r^2$ ) |
|-----------------------|-----------------------------|
| HP2 on all haplotypes | 0.14                        |
| HP2 on haplotype A    | 0.08                        |
| HP2 on haplotype B    | 0.82                        |
| HP2 on haplotype C    | 0.06                        |

**Supplementary Table 8. Association of HP structural variation and lipid levels (mg/dL beta estimates).** Analyses were performed on untransformed lipid values to generate beta estimates in mg/dL units. Baseline lipid measures were regressed on HP2 CNV, rs2000999 and combined model adjusted for age, sex and 10 study specific PCAs.

| MarkerName                  | Allele1 | Allele2 | Freq1  | FreqS<br>E | MinF<br>req | MaxF<br>req | Effect  | StdErr | P-value  | Direction | HetChiSq | df | P-value |
|-----------------------------|---------|---------|--------|------------|-------------|-------------|---------|--------|----------|-----------|----------|----|---------|
| HP2_hdl_mg                  | a       | b       | 0.6391 | 0.0281     | 0.616<br>5  | 0.701<br>1  | 0.1249  | 0.154  | 4.17E-01 | +--++++   | 3.674    | 6  | 0.7206  |
| HP2_ldl_mg                  | a       | b       | 0.6404 | 0.0278     | 0.619<br>4  | 0.701<br>2  | 2.1555  | 0.376  | 9.93E-09 | +++++++   | 4.904    | 6  | 0.5562  |
| HP2_tchol_mg                | a       | b       | 0.6386 | 0.0269     | 0.616<br>5  | 0.701<br>1  | 2.6051  | 0.4106 | 2.24E-10 | +++-----  | 9.324    | 6  | 0.1561  |
| HP2_trigs_mg                | a       | b       | 0.6439 | 0.032      | 0.616<br>5  | 0.701<br>1  | 1.6192  | 0.8361 | 5.28E-02 | ++-----   | 8.729    | 6  | 0.1894  |
| rs2000999_hdl_mg            | a       | b       | 0.1972 | 0.0076     | 0.183<br>7  | 0.204<br>3  | -0.2203 | 0.1719 | 2.00E-01 | -------   | 3.698    | 6  | 0.7175  |
| rs2000999_ldl_mg            | a       | b       | 0.1973 | 0.0077     | 0.183<br>8  | 0.204<br>3  | 2.1013  | 0.4189 | 5.28E-07 | +++-----  | 8.92     | 6  | 0.1781  |
| rs2000999_tchol_mg          | a       | b       | 0.1977 | 0.0074     | 0.183<br>7  | 0.204<br>4  | 2.3835  | 0.4598 | 2.17E-07 | +++-----  | 7.444    | 6  | 0.2818  |
| rs2000999_trigs_mg          | a       | b       | 0.1955 | 0.0082     | 0.183<br>7  | 0.204<br>4  | 1.9438  | 0.9161 | 3.39E-02 | +++-----  | 11.93    | 6  | 0.06355 |
| HP2_hdl_mg_ConD_rs2000999   | a       | b       | 0.6392 | 0.0281     | 0.616<br>5  | 0.701<br>1  | 0.234   | 0.1663 | 1.59E-01 | +--++++   | 7.655    | 6  | 0.2645  |
| HP2_ldl_mg_ConD_rs2000999   | a       | b       | 0.6405 | 0.0278     | 0.619<br>4  | 0.701<br>2  | 1.7058  | 0.406  | 2.65E-05 | +++++++   | 1.784    | 6  | 0.9384  |
| HP2_tchol_mg_ConD_rs2000999 | a       | b       | 0.6387 | 0.0269     | 0.616<br>5  | 0.701<br>1  | 2.1109  | 0.4433 | 1.92E-06 | +++-----  | 6.744    | 6  | 0.3452  |
| HP2_trigs_mg_ConD_rs2000999 | a       | b       | 0.644  | 0.032      | 0.616<br>5  | 0.701<br>1  | 1.064   | 0.9025 | 2.38E-01 | +++-----  | 14.405   | 6  | 0.02543 |
| rs2000999_hdl_mg_ConD_HP2   | a       | b       | 0.1972 | 0.0076     | 0.183<br>7  | 0.204<br>3  | -0.3219 | 0.1856 | 8.28E-02 | -------   | 7.636    | 6  | 0.266   |
| rs2000999_ldl_mg_ConD_HP2   | a       | b       | 0.1973 | 0.0077     | 0.183<br>8  | 0.204<br>3  | 1.3885  | 0.4521 | 2.13E-03 | +++-----  | 6.331    | 6  | 0.3872  |
| rs2000999_tchol_mg_ConD_HP2 | a       | b       | 0.1977 | 0.0074     | 0.183<br>7  | 0.204<br>4  | 1.4903  | 0.4961 | 2.66E-03 | +++-----  | 5.165    | 6  | 0.5228  |
| rs2000999_trigs_mg_ConD_HP2 | a       | b       | 0.1955 | 0.0082     | 0.183<br>7  | 0.204<br>4  | 1.4634  | 0.9889 | 1.39E-01 | +++-----  | 17.556   | 6  | 0.00744 |

**Supplementary Table 9. Combinations of diploid genotypes are a unique sum of two haplotypes.** Boundary locations (A-E) are shown in Supplementary Fig. 4b. This conversion chart was used to determine subtypes from diploid copy number calls.

| <b>Boundary copy number assay</b> | <b>A</b> | <b>B</b> | <b>C</b> | <b>D</b> | <b>E</b> |
|-----------------------------------|----------|----------|----------|----------|----------|
| HP1S                              | 0        | 0        | 0        | 0        | 0        |
| HP1S                              | 0        | 0        | 0        | 0        | 0        |
| Diploid genotype combination      | 0        | 0        | 0        | 0        | 0        |
|                                   |          |          |          |          |          |
| HP1F                              | 1        | 1        | 0        | 0        | 0        |
| HP1F                              | 1        | 1        | 0        | 0        | 0        |
| Diploid genotype combination      | 2        | 2        | 0        | 0        | 0        |
|                                   |          |          |          |          |          |
| HP2FS                             | 1        | 0        | 0        | 1        | 1        |
| HP2FS                             | 1        | 0        | 0        | 1        | 1        |
| Diploid genotype combination      | 2        | 0        | 0        | 2        | 2        |
|                                   |          |          |          |          |          |
| HP2SS                             | 0        | 0        | 1        | 1        | 1        |
| HP2SS                             | 0        | 0        | 1        | 1        | 1        |
| Diploid genotype combination      | 0        | 0        | 2        | 2        | 2        |
|                                   |          |          |          |          |          |
| HP1S                              | 0        | 0        | 0        | 0        | 0        |
| HP1F                              | 1        | 1        | 0        | 0        | 0        |
| Diploid genotype combination      | 1        | 1        | 0        | 0        | 0        |
|                                   |          |          |          |          |          |
| HP1S                              | 0        | 0        | 0        | 0        | 0        |
| HP2FS                             | 1        | 0        | 0        | 1        | 1        |
| Diploid genotype combination      | 1        | 0        | 0        | 1        | 1        |
|                                   |          |          |          |          |          |
| HP1S                              | 0        | 0        | 0        | 0        | 0        |
| HP2SS                             | 0        | 0        | 1        | 1        | 1        |

|                              |   |   |   |   |   |
|------------------------------|---|---|---|---|---|
| Diploid genotype combination | 0 | 0 | 1 | 1 | 1 |
|                              |   |   |   |   |   |
| HP1F                         | 1 | 1 | 0 | 0 | 0 |
| HP2FS                        | 1 | 0 | 0 | 1 | 1 |
| Diploid genotype combination | 2 | 1 | 0 | 1 | 1 |
|                              |   |   |   |   |   |
| HP1F                         | 1 | 1 | 0 | 0 | 0 |
| HP2SS                        | 0 | 0 | 1 | 1 | 1 |
| Diploid genotype combination | 1 | 1 | 1 | 1 | 1 |
|                              |   |   |   |   |   |
| HP2FS                        | 1 | 0 | 0 | 1 | 1 |
| HP2SS                        | 0 | 0 | 1 | 1 | 1 |
| Diploid genotype combination | 1 | 0 | 1 | 1 | 1 |

**Supplementary Table 10. *HP* subtypes are in Hardy-Weinberg Equilibrium (HWE).** A chi-squared test was used to calculate p-values for Hardy Weinberg equilibrium in each population.

| Population | Genotype   | Observed Genotype Counts | $X^2$ | <i>p</i> value |
|------------|------------|--------------------------|-------|----------------|
| CEU        | HP1S, HP1S | 6                        |       |                |

|     |              |    |      |      |
|-----|--------------|----|------|------|
| CEU | HP1S, HP1F   | 7  |      |      |
| CEU | HP1S, HP2FS  | 33 |      |      |
| CEU | HP1S, HP2SS  | 2  |      |      |
| CEU | HP1F, HP1F   | 1  |      |      |
| CEU | HP1F, HP2FS  | 24 |      |      |
| CEU | HP1F, HP2SS  | 0  |      |      |
| CEU | HP2FS, HP2FS | 41 |      |      |
| CEU | HP2FS, HP2SS | 5  |      |      |
| CEU | HP2SS, HP2SS | 0  | 2.15 | 0.99 |
| IBS | HP1S, HP1S   | 6  |      |      |
| IBS | HP1S, HP1F   | 8  |      |      |
| IBS | HP1S, HP2FS  | 26 |      |      |
| IBS | HP1S, HP2SS  | 2  |      |      |
| IBS | HP1F, HP1F   | 2  |      |      |
| IBS | HP1F, HP2FS  | 16 |      |      |
| IBS | HP1F, HP2SS  | 3  |      |      |
| IBS | HP2FS, HP2FS | 29 |      |      |
| IBS | HP2FS, HP2SS | 2  |      |      |
| IBS | HP2SS, HP2SS | 0  | 4.02 | 0.91 |
| TSI | HP1S, HP1S   | 5  |      |      |
| TSI | HP1S, HP1F   | 4  |      |      |
| TSI | HP1S, HP2FS  | 21 |      |      |
| TSI | HP1S, HP2SS  | 2  |      |      |
| TSI | HP1F, HP1F   | 1  |      |      |
| TSI | HP1F, HP2FS  | 15 |      |      |
| TSI | HP1F, HP2SS  | 0  |      |      |
| TSI | HP2FS, HP2FS | 36 |      |      |
| TSI | HP2FS, HP2SS | 2  |      |      |
| TSI | HP2SS, HP2SS | 0  | 3.37 | 0.95 |
| YRI | HP1S, HP1S   | 4  |      |      |
| YRI | HP1S, HP1F   | 19 |      |      |
| YRI | HP1S, HP2FS  | 15 |      |      |
| YRI | HP1F, HP1F   | 19 |      |      |
| YRI | HP1F, HP2FS  | 43 |      |      |
| YRI | HP2FS, HP2FS | 18 | 0.8  | 0.98 |



**Supplementary Table 11. *HP* subtypes are consistent with trio transmission.**

Haploid structural alleles were determined from diploid copy number calls using Supplementary Table 1. Haplotypes in each trio are denoted as “-T” for transmitted or “-U “ for untransmitted.

| <b>Source</b>     |                     |                |
|-------------------|---------------------|----------------|
| <b>Individual</b> | <b>Relationship</b> | <b>Subtype</b> |
| NA12146           | father-T            | HP1S           |
| NA12146           | father-U            | HP2FS          |
| NA12239           | mother-T            | HP2FS          |
| NA12239           | mother-U            | HP2FS          |
| NA12144           | father-T            | HP1F           |
| NA12144           | father-U            | HP2FS          |
| NA12145           | mother-T            | HP1S           |
| NA12145           | mother-U            | HP2FS          |
| NA07022           | father-T            | HP1F           |
| NA07022           | father-U            | HP1F           |
| NA07056           | mother-T            | HP2FS          |
| NA07056           | mother-U            | HP1S           |
| NA06993           | father-T            | HP2FS          |
| NA06993           | father-U            | HP2FS          |
| NA06985           | mother-T            | HP2FS          |
| NA06985           | mother-U            | HP2FS          |
| NA07034           | father-T            | HP1S           |
| NA07034           | father-U            | HP2FS          |
| NA07055           | mother-T            | HP2SS          |
| NA07055           | mother-U            | HP2FS          |
| NA12056           | father-T            | HP1S           |
| NA12056           | father-U            | HP1F           |
| NA12057           | mother-T            | HP2FS          |

|         |          |       |
|---------|----------|-------|
| NA12057 | mother-U | HP2FS |
| NA07357 | father-U | HP2FS |
| NA07357 | father-T | HP2SS |
| NA07345 | mother-T | HP2FS |
| NA07345 | mother-U | HP1S  |
| NA11881 | father-T | HP2FS |
| NA11881 | father-U | HP2FS |
| NA11882 | mother-T | HP1S  |
| NA11882 | mother-U | HP1F  |
| NA11839 | father-T | HP2FS |
| NA11839 | father-U | HP1S  |
| NA11840 | mother-T | HP2SS |
| NA11840 | mother-U | HP2FS |
| NA11831 | father-T | HP1F  |
| NA11831 | father-U | HP2FS |
| NA11832 | mother-T | HP2FS |
| NA11832 | mother-U | HP2FS |
| NA11829 | father-T | HP2FS |
| NA11829 | father-U | HP2FS |
| NA11830 | mother-T | HP1F  |
| NA11830 | mother-U | HP2FS |
| NA12716 | father-T | HP2FS |
| NA12716 | father-U | HP2FS |
| NA12717 | mother-T | HP2SS |
| NA12717 | mother-U | HP1S  |
| NA11994 | father-T | HP1S  |
| NA11994 | father-U | HP1S  |
| NA11995 | mother-T | HP2FS |
| NA11995 | mother-U | HP1S  |
| NA11992 | father-T | HP1S  |
| NA11992 | father-U | HP2FS |

|         |          |       |
|---------|----------|-------|
| NA11993 | mother-T | HP2FS |
| NA11993 | mother-U | HP2FS |
| NA12264 | father-T | HP2FS |
| NA12264 | father-U | HP1F  |
| NA12234 | mother-T | HP2FS |
| NA12234 | mother-U | HP2FS |
| NA12155 | father-T | HP2FS |
| NA12155 | father-U | HP2FS |
| NA12156 | mother-T | HP1S  |
| NA12156 | mother-U | HP1F  |
| NA12154 | father-T | HP1S  |
| NA12154 | father-U | HP1S  |
| NA12236 | mother-T | HP2SS |
| NA12236 | mother-U | HP2FS |
| NA12248 | father-T | HP2FS |
| NA12248 | father-U | HP2FS |
| NA12249 | mother-T | HP1S  |
| NA12249 | mother-U | HP2FS |
| NA12005 | father-T | HP2FS |
| NA12005 | father-U | HP1F  |
| NA12006 | mother-T | HP1S  |
| NA12006 | mother-U | HP2FS |
| NA12003 | father-T | HP2FS |
| NA12003 | father-U | HP2FS |
| NA12004 | mother-T | HP2FS |
| NA12004 | mother-U | HP2FS |
| NA12750 | father-T | HP1S  |
| NA12750 | father-U | HP1S  |
| NA12751 | mother-T | HP1S  |
| NA12751 | mother-U | HP2FS |
| NA12762 | father-T | HP2FS |

|         |          |       |
|---------|----------|-------|
| NA12762 | father-U | HP2FS |
| NA12763 | mother-T | HP2FS |
| NA12763 | mother-U | HP2FS |
| NA12760 | father-T | HP1F  |
| NA12760 | father-U | HP2FS |
| NA12761 | mother-T | HP2FS |
| NA12761 | mother-U | HP1S  |
| NA12814 | father-T | HP2FS |
| NA12814 | father-U | HP2FS |
| NA12815 | mother-T | HP2FS |
| NA12815 | mother-U | HP1S  |
| NA12812 | father-T | HP2FS |
| NA12812 | father-U | HP2FS |
| NA12813 | mother-T | HP2FS |
| NA12813 | mother-U | HP2FS |
| NA12874 | father-T | HP1S  |
| NA12874 | father-U | HP1S  |
| NA12875 | mother-T | HP2FS |
| NA12875 | mother-U | HP2FS |
| NA12872 | father-T | HP2FS |
| NA12872 | father-U | HP1S  |
| NA12873 | mother-T | HP2FS |
| NA12873 | mother-U | HP2FS |
| NA12891 | father-T | HP2FS |
| NA12891 | father-U | HP2FS |
| NA12892 | mother-T | HP2FS |
| NA12892 | mother-U | HP2FS |
| NA06984 | father-T | HP2FS |
| NA06984 | father-U | HP1F  |
| NA06989 | mother-T | HP2FS |
| NA06989 | mother-U | HP2FS |

|         |          |       |
|---------|----------|-------|
| NA12342 | father-T | HP1F  |
| NA12342 | father-U | HP2FS |
| NA12343 | mother-T | HP2FS |
| NA12343 | mother-U | HP2FS |
| NA12340 | father-T | HP1S  |
| NA12340 | father-U | HP2FS |
| NA12341 | mother-T | HP2FS |
| NA12341 | mother-U | HP1F  |
| NA07347 | father-T | HP2FS |
| NA07347 | father-U | HP1F  |
| NA07346 | mother-T | HP2SS |
| NA07346 | mother-U | HP1S  |
| NA12546 | father-T | HP2FS |
| NA12546 | father-U | HP2FS |
| NA12489 | mother-T | HP1F  |
| NA12489 | mother-U | HP2FS |
| NA12399 | father-T | HP1F  |
| NA12399 | father-U | HP2FS |
| NA12400 | mother-T | HP1S  |
| NA12400 | mother-U | HP2FS |
| NA12414 | mother-T | HP2FS |
| NA12414 | mother-U | HP1F  |
| NA12413 | father-T | HP2FS |
| NA12413 | father-U | HP1S  |
| NA11893 | father-T | HP2FS |
| NA11893 | father-U | HP2FS |
| NA11894 | mother-T | HP1S  |
| NA11894 | mother-U | HP2FS |
| NA11891 | father-T | HP1S  |
| NA11891 | father-U | HP1F  |
| NA11892 | mother-T | HP2FS |

|         |          |       |
|---------|----------|-------|
| NA11892 | mother-U | HP1F  |
| NA12274 | father-T | HP1S  |
| NA12274 | father-U | HP2FS |
| NA12275 | mother-T | HP2FS |
| NA12275 | mother-U | HP2FS |
| NA12272 | father-T | HP1F  |
| NA12272 | father-U | HP2FS |
| NA12273 | mother-T | HP1S  |
| NA12273 | mother-U | HP2FS |
| NA12286 | father-T | HP1F  |
| NA12286 | father-U | HP2FS |
| NA12287 | mother-T | HP1F  |
| NA12287 | mother-U | HP1S  |
| NA11919 | father-T | HP2FS |
| NA11919 | father-U | HP2FS |
| NA11920 | mother-T | HP2FS |
| NA11920 | mother-U | HP1F  |
| NA11917 | father-T | HP1S  |
| NA11917 | father-U | HP2FS |
| NA11918 | mother-T | HP2FS |
| NA11918 | mother-U | HP2FS |
| NA11930 | father-T | HP2FS |
| NA11930 | father-U | HP2FS |
| NA11931 | mother-T | HP2FS |
| NA11931 | mother-U | HP2FS |
| NA12748 | father-T | HP2FS |
| NA12748 | father-U | HP1S  |
| NA12749 | mother-T | HP2FS |
| NA12749 | mother-U | HP1F  |
| NA12777 | father-T | HP2FS |
| NA12777 | father-U | HP2FS |

|         |          |       |
|---------|----------|-------|
| NA12778 | mother-T | HP2SS |
| NA12778 | mother-U | HP2FS |
| NA12775 | father-T | HP1S  |
| NA12775 | father-U | HP1S  |
| NA12776 | mother-T | HP2FS |
| NA12776 | mother-U | HP2FS |
| NA12829 | father-T | HP2FS |
| NA12829 | father-U | HP2FS |
| NA12830 | mother-T | HP2FS |
| NA12830 | mother-U | HP1S  |
| NA12827 | father-T | HP1F  |
| NA12827 | father-U | HP2FS |
| NA12828 | mother-T | HP2FS |
| NA12828 | mother-U | HP2FS |
| NA12842 | father-T | HP2FS |
| NA12842 | father-U | HP2FS |
| NA12843 | mother-T | HP1S  |
| NA12843 | mother-U | HP2FS |
| NA12889 | father-T | HP2FS |
| NA12889 | father-U | HP2FS |
| NA12890 | mother-T | HP1F  |
| NA12890 | mother-U | HP2FS |
| NA12347 | father-T | HP1F  |
| NA12347 | father-U | HP1S  |
| NA12348 | mother-T | HP1S  |
| NA12348 | mother-U | HP1S  |
| NA06986 | father-T | HP2FS |
| NA06986 | father-U | HP2FS |
| NA07045 | mother-T | HP1S  |
| NA07045 | mother-U | HP2FS |
| NA07435 | father-T | HP1S  |

|         |          |       |
|---------|----------|-------|
| NA07435 | father-U | HP2FS |
| NA07037 | mother-T | HP2FS |
| NA07037 | mother-U | HP1F  |
| NA07051 | father-T | HP2FS |
| NA07051 | father-U | HP2FS |
| NA07031 | mother-T | HP2FS |
| NA07031 | mother-U | HP1S  |
| HG01500 | father-T | HP2FS |
| HG01500 | father-U | HP1S  |
| HG01501 | mother-T | HP2FS |
| HG01501 | mother-U | HP2FS |
| HG01503 | father-T | HP1S  |
| HG01503 | father-U | HP2FS |
| HG01504 | mother-T | HP1F  |
| HG01504 | mother-U | HP1S  |
| HG01506 | father-T | HP1F  |
| HG01506 | father-U | HP2FS |
| HG01507 | mother-T | HP2FS |
| HG01507 | mother-U | HP2FS |
| HG01509 | father-T | HP2FS |
| HG01509 | father-U | HP2FS |
| HG01510 | mother-T | HP2FS |
| HG01510 | mother-U | HP1F  |
| HG01512 | father-T | HP1S  |
| HG01512 | father-U | HP1S  |
| HG01513 | mother-T | HP2FS |
| HG01513 | mother-U | HP1S  |
| HG01515 | father-T | HP2FS |
| HG01515 | father-U | HP1F  |
| HG01516 | mother-T | HP2FS |
| HG01516 | mother-U | HP2FS |



|         |          |       |
|---------|----------|-------|
| HG01518 | father-T | HP2FS |
| HG01518 | father-U | HP2FS |
| HG01519 | mother-T | HP2FS |
| HG01519 | mother-U | HP1S  |
| HG01521 | father-T | HP2FS |
| HG01521 | father-U | HP1F  |
| HG01522 | mother-T | HP1F  |
| HG01522 | mother-U | HP1S  |
| HG01524 | father-T | HP2FS |
| HG01524 | father-U | HP2SS |
| HG01525 | mother-T | HP1S  |
| HG01525 | mother-U | HP1F  |
| HG01527 | father-T | HP1S  |
| HG01527 | father-U | HP1S  |
| HG01528 | mother-T | HP1S  |
| HG01528 | mother-U | HP1S  |
| HG01530 | father-T | HP1F  |
| HG01530 | father-U | HP2SS |
| HG01531 | mother-T | HP2FS |
| HG01531 | mother-U | HP1F  |
| HG01536 | father-T | HP1F  |
| HG01536 | father-U | HP2FS |
| HG01537 | mother-T | HP2FS |
| HG01537 | mother-U | HP1S  |
| HG01631 | father-T | HP1S  |
| HG01631 | father-U | HP2SS |
| HG01632 | mother-T | HP2FS |
| HG01632 | mother-U | HP2FS |
| HG01630 | father-T | HP2FS |
| HG01630 | father-U | HP2FS |
| HG01628 | mother-T | HP2FS |

|         |          |       |
|---------|----------|-------|
| HG01628 | mother-U | HP1S  |
| HG01625 | father-T | HP2FS |
| HG01625 | father-U | HP1F  |
| HG01626 | mother-T | HP2FS |
| HG01626 | mother-U | HP2FS |
| HG01624 | father-T | HP2FS |
| HG01624 | father-U | HP2FS |
| HG01623 | mother-T | HP1S  |
| HG01623 | mother-U | HP2FS |
| HG01619 | father-T | HP2FS |
| HG01619 | father-U | HP1S  |
| HG01620 | mother-T | HP2FS |
| HG01620 | mother-U | HP2FS |
| HG01617 | father-T | HP1S  |
| HG01617 | father-U | HP2FS |
| HG01618 | mother-T | HP2FS |
| HG01618 | mother-U | HP2FS |
| HG01615 | father-T | HP2FS |
| HG01615 | father-U | HP1S  |
| HG01613 | mother-T | HP2FS |
| HG01613 | mother-U | HP1S  |
| HG01610 | father-T | HP1S  |
| HG01610 | father-U | HP2FS |
| HG01612 | mother-T | HP2FS |
| HG01612 | mother-U | HP1F  |
| HG01608 | father-T | HP1F  |
| HG01608 | father-U | HP1F  |
| HG01607 | mother-T | HP1S  |
| HG01607 | mother-U | HP2SS |
| HG01603 | father-T | HP2FS |
| HG01603 | father-U | HP1S  |

|         |          |       |
|---------|----------|-------|
| HG01602 | mother-T | HP2FS |
| HG01602 | mother-U | HP2FS |
| HG01672 | father-T | HP1S  |
| HG01672 | father-U | HP1S  |
| HG01670 | mother-T | HP1F  |
| HG01670 | mother-U | HP1S  |
| HG01675 | father-T | HP1S  |
| HG01675 | father-U | HP2FS |
| HG01673 | mother-T | HP1F  |
| HG01673 | mother-U | HP2FS |
| HG01678 | father-T | HP2FS |
| HG01678 | father-U | HP2FS |
| HG01676 | mother-T | HP2FS |
| HG01676 | mother-U | HP2FS |
| HG01680 | father-T | HP1F  |
| HG01680 | father-U | HP1S  |
| HG01679 | motheR-T | HP1F  |
| HG01679 | mother-U | HP2SS |
| HG01682 | father-T | HP2FS |
| HG01682 | father-U | HP2FS |
| HG01684 | mother-T | HP2FS |
| HG01684 | mother-U | HP2FS |
| HG01686 | father-T | HP2FS |
| HG01686 | father-U | HP2FS |
| HG01685 | mother-T | HP2FS |
| HG01685 | mother-U | HP2FS |
| HG01694 | father-T | HP2FS |
| HG01694 | father-U | HP2FS |
| HG01695 | mother-T | HP1F  |
| HG01695 | mother-U | HP2FS |
| HG01699 | father-T | HP2FS |

|         |          |       |
|---------|----------|-------|
| HG01699 | father-U | HP2FS |
| HG01697 | mother-T | HP2FS |
| HG01697 | mother-U | HP2FS |
| HG01700 | father-T | HP2FS |
| HG01700 | father-U | HP1F  |
| HG01702 | mother-T | HP1F  |
| HG01702 | mother-U | HP1S  |
| HG01705 | father-T | HP1F  |
| HG01705 | father-U | HP2FS |
| HG01704 | mother-T | HP2FS |
| HG01704 | mother-U | HP1S  |
| HG01708 | father-T | HP1F  |
| HG01708 | father-U | HP2SS |
| HG01707 | mother-T | HP1S  |
| HG01707 | mother-U | HP1S  |
| HG01709 | father-T | HP1S  |
| HG01709 | father-U | HP1F  |
| HG01710 | mother-T | HP2FS |
| HG01710 | mother-U | HP2FS |
| HG01747 | father-T | HP2FS |
| HG01747 | father-U | HP2FS |
| HG01746 | mother-T | HP2FS |
| HG01746 | mother-U | HP2FS |
| HG01756 | father-T | HP2FS |
| HG01756 | father-U | HP1F  |
| HG01757 | mother-T | HP1F  |
| HG01757 | mother-U | HP1F  |
| HG01771 | father-T | HP1F  |
| HG01771 | father-U | HP1S  |
| HG01770 | mother-T | HP1S  |
| HG01770 | mother-U | HP2FS |

|         |          |       |
|---------|----------|-------|
| HG01775 | father-T | HP2FS |
| HG01775 | father-U | HP1S  |
| HG01773 | mother-T | HP1S  |
| HG01773 | mother-U | HP1S  |
| HG01777 | father-T | HP2FS |
| HG01777 | father-U | HP2FS |
| HG01776 | mother-T | HP2FS |
| HG01776 | mother-U | HP2FS |
| HG01781 | father-T | HP2FS |
| HG01781 | father-U | HP1S  |
| HG01779 | mother-T | HP2FS |
| HG01779 | mother-U | HP1S  |
| HG01783 | father-T | HP2FS |
| HG01783 | father-U | HP2FS |
| HG01784 | mother-T | HP1S  |
| HG01784 | mother-U | HP2FS |
| HG02224 | father-T | HP2FS |
| HG02224 | father-U | HP1S  |
| HG02223 | mother-T | HP2FS |
| HG02223 | mother-U | HP1F  |
| HG02236 | father-T | HP2FS |
| HG02236 | father-U | HP1S  |
| HG02235 | mother-T | HP2SS |
| HG02235 | mother-U | HP2FS |
| HG02238 | father-T | HP2FS |
| HG02238 | father-U | HP2FS |
| HG02239 | mother-T | HP2FS |
| HG02239 | mother-U | HP1S  |
| NA18501 | father-T | HP1F  |
| NA18501 | father-U | HP1F  |
| NA18502 | mother-T | HP1S  |

|         |          |       |
|---------|----------|-------|
| NA18502 | mother-U | HP2FS |
| NA18504 | father-T | HP2FS |
| NA18504 | father-U | HP1S  |
| NA18505 | mother-T | HP2FS |
| NA18505 | mother-U | HP1F  |
| NA18859 | father-T | HP2FS |
| NA18859 | father-U | HP1S  |
| NA18858 | mother-T | HP2FS |
| NA18858 | mother-U | HP1F  |
| NA18522 | father-T | HP2FS |
| NA18522 | father-U | HP1F  |
| NA18523 | mother-T | HP2FS |
| NA18523 | mother-U | HP2FS |
| NA18871 | father-T | HP1F  |
| NA18871 | father-U | HP1F  |
| NA18870 | mother-T | HP1F  |
| NA18870 | mother-U | HP2FS |
| NA18853 | father-T | HP1F  |
| NA18853 | father-U | HP1F  |
| NA18852 | mother-T | HP1F  |
| NA18852 | mother-U | HP2FS |
| NA18856 | father-T | HP1F  |
| NA18856 | father-U | HP2FS |
| NA18855 | mother-T | HP1F  |
| NA18855 | mother-U | HP1S  |
| NA18862 | father-T | HP2FS |
| NA18862 | father-U | HP2FS |
| NA18861 | mother-T | HP1S  |
| NA18861 | mother-U | HP1F  |
| NA18913 | father-T | HP1F  |
| NA18913 | father-U | HP2FS |

|         |          |       |
|---------|----------|-------|
| NA18912 | mother-T | HP1F  |
| NA18912 | mother-U | HP2FS |
| NA19101 | father-T | HP2FS |
| NA19101 | father-U | HP1S  |
| NA19102 | mother-U | HP2FS |
| NA19102 | mother-U | HP2FS |
| NA19138 | father-T | HP1F  |
| NA19138 | father-U | HP1S  |
| NA19137 | mother-T | HP1F  |
| NA19137 | mother-U | HP1F  |
| NA19200 | father-T | HP1S  |
| NA19200 | father-U | HP1F  |
| NA19201 | mother-T | HP1F  |
| NA19201 | mother-U | HP2FS |
| NA19171 | father-T | HP1S  |
| NA19171 | father-U | HP1F  |
| NA19172 | mother-T | HP2FS |
| NA19172 | mother-U | HP1F  |
| NA19210 | father-T | HP1S  |
| NA19210 | father-U | HP2FS |
| NA19209 | mother-T | HP1S  |
| NA19209 | mother-U | HP2FS |
| NA19160 | father-T | HP1F  |
| NA19160 | father-U | HP1F  |
| NA19159 | mother-T | HP2FS |
| NA19159 | mother-U | HP2FS |
| NA19223 | father-T | HP2FS |
| NA19223 | father-U | HP1F  |
| NA19222 | mother-T | HP2FS |
| NA19222 | mother-U | HP1F  |
| NA19141 | father-T | HP2FS |

|         |          |       |
|---------|----------|-------|
| NA19141 | father-U | HP2FS |
| NA19140 | mother-T | HP1S  |
| NA19140 | mother-U | HP1S  |
| NA19153 | father-T | HP2FS |
| NA19153 | father-U | HP1F  |
| NA19152 | mother-T | HP2FS |
| NA19152 | mother-U | HP2FS |
| NA19144 | father-T | HP1F  |
| NA19144 | father-U | HP2FS |
| NA19143 | mother-T | HP1S  |
| NA19143 | mother-U | HP1F  |
| NA19128 | father-T | HP2FS |
| NA19128 | father-U | HP1S  |
| NA19127 | mother-T | HP1F  |
| NA19127 | mother-U | HP1F  |
| NA19130 | father-T | HP1F  |
| NA19130 | father-U | HP1F  |
| NA19131 | mother-T | HP1F  |
| NA19131 | mother-U | HP2FS |
| NA19098 | father-T | HP2FS |
| NA19098 | father-U | HP2FS |
| NA19099 | mother-T | HP2FS |
| NA19099 | mother-U | HP2FS |
| NA19192 | father-T | HP2FS |
| NA19192 | father-U | HP1F  |
| NA19193 | mother-T | HP1F  |
| NA19193 | mother-U | HP1F  |
| NA19239 | father-T | HP1F  |
| NA19239 | father-U | HP1F  |
| NA19238 | mother-T | HP2FS |
| NA19238 | mother-U | HP2FS |



|         |          |       |
|---------|----------|-------|
| NA18486 | father-T | HP1F  |
| NA18486 | father-U | HP1F  |
| NA18488 | mother-T | HP1F  |
| NA18488 | mother-U | HP1F  |
| NA18487 | father-T | HP2FS |
| NA18487 | father-U | HP1F  |
| NA18489 | mother-T | HP1F  |
| NA18489 | mother-U | HP1S  |
| NA18498 | father-T | HP1F  |
| NA18498 | father-U | HP1F  |
| NA18499 | mother-T | HP2FS |
| NA18499 | mother-U | HP2FS |
| NA19107 | father-T | HP1F  |
| NA19107 | father-U | HP2FS |
| NA19108 | mother-T | HP2FS |
| NA19108 | mother-U | HP1S  |
| NA18868 | father-T | HP1F  |
| NA18868 | father-U | HP2FS |
| NA18867 | mother-T | HP1F  |
| NA18867 | mother-U | HP1F  |
| NA18519 | father-T | HP1F  |
| NA18519 | father-U | HP2FS |
| NA18520 | mother-T | HP1F  |
| NA18520 | mother-U | HP1F  |
| NA18874 | father-T | HP1F  |
| NA18874 | father-U | HP1F  |
| NA18873 | mother-T | HP1F  |
| NA18873 | mother-U | HP2FS |
| NA18910 | father-T | HP1F  |
| NA18910 | father-U | HP1F  |
| NA18909 | mother-T | HP1S  |

|         |          |       |
|---------|----------|-------|
| NA18909 | mother-U | HP1F  |
| NA18917 | father-T | HP2FS |
| NA18917 | father-U | HP2FS |
| NA18916 | mother-T | HP1S  |
| NA18916 | mother-U | HP1F  |
| NA18923 | father-T | HP2FS |
| NA18923 | father-U | HP2FS |
| NA18924 | mother-T | HP1F  |
| NA18924 | mother-U | HP1F  |
| NA19198 | father-T | HP1S  |
| NA19198 | father-U | HP1F  |
| NA19197 | mother-T | HP2FS |
| NA19197 | mother-U | HP2FS |
| NA18934 | father-T | HP1S  |
| NA18934 | father-U | HP1S  |
| NA18933 | mother-T | HP1F  |
| NA18933 | mother-U | HP1S  |
| NA19178 | father-T | HP1F  |
| NA19178 | father-U | HP1S  |
| NA19179 | mother-T | HP1F  |
| NA19179 | mother-U | HP1F  |
| NA19184 | father-T | HP2FS |
| NA19184 | father-U | HP1F  |
| NA19185 | mother-T | HP1S  |
| NA19185 | mother-U | HP1S  |
| NA19096 | father-T | HP2FS |
| NA19096 | father-U | HP2FS |
| NA19095 | mother-T | HP1S  |
| NA19095 | mother-U | HP1F  |
| NA19175 | father-T | HP1S  |
| NA19175 | father-U | HP2FS |

|         |          |       |
|---------|----------|-------|
| NA19176 | mother-T | HP1F  |
| NA19176 | mother-U | HP1F  |
| NA19226 | father-T | HP2FS |
| NA19226 | father-U | HP1S  |
| NA19225 | mother-T | HP1F  |
| NA19225 | mother-U | HP2FS |
| NA19121 | father-T | HP1F  |
| NA19121 | father-U | HP2FS |
| NA19122 | mother-T | HP1F  |
| NA19122 | mother-U | HP1S  |
| NA19150 | father-T | HP1S  |
| NA19150 | father-U | HP1F  |
| NA19149 | mother-T | HP1S  |
| NA19149 | mother-U | HP1F  |
| NA19113 | father-T | HP2FS |
| NA19113 | father-U | HP1F  |
| NA19114 | mother-T | HP1S  |
| NA19114 | mother-U | HP2FS |
| NA19256 | father-T | HP1F  |
| NA19256 | father-U | HP1F  |
| NA19257 | mother-T | HP2FS |
| NA19257 | mother-U | HP1S  |
| NA19117 | father-T | HP2FS |
| NA19117 | father-U | HP1S  |
| NA19118 | mother-T | HP1S  |
| NA19118 | mother-U | HP1S  |
| NA19189 | father-T | HP2FS |
| NA19189 | father-U | HP2FS |
| NA19190 | mother-T | HP2FS |
| NA19190 | mother-U | HP2FS |
| NA19236 | father-T | HP2FS |

|         |          |       |
|---------|----------|-------|
| NA19236 | father-U | HP1F  |
| NA19235 | mother-T | HP1S  |
| NA19235 | mother-U | HP1F  |
| NA19248 | father-T | HP2FS |
| NA19248 | father-U | HP1F  |
| NA19247 | mother-T | HP1S  |
| NA19247 | mother-U | HP2FS |

**Supplementary Table 12. Rare *HP* triplication subtype and base pair differences that disrupt boundary assays.** The table below indicates the sample that did not match one of four structural alleles (likely *HP* triplication) as well as individuals containing single base pair mutations that interfere with the boundary breakpoint assays as shown in Supplementary Fig. 4b. The remaining 580 haplotypes typed in this study contained the standard boundaries as typed by the assays in Supplementary Fig. 4b and were consistent with one of the four common subtypes.

| Low Frequency Variant                                                                            | Carriers                                          | Evidence                         |
|--------------------------------------------------------------------------------------------------|---------------------------------------------------|----------------------------------|
| Likely triplication<br>Copy number 3 at HP2<br>(breakpoint assay E)                              | NA20806                                           | triplicate ddPCR<br>measurements |
| T to C mutation at chr16:<br>72091054 which disrupts<br>breakpoint assay A on<br>HP2FS haplotype | NA20524, NA20803,<br>HG01783, HG01782,<br>NA12892 | Sanger sequencing                |
| T to C mutation at chr16:<br>72091102 which disrupts<br>breakpoint assay A on<br>HP2FS haplotype | HG01686, NA12873,<br>NA12864                      | Sanger sequencing                |

**Supplementary Table 13. Phasing recent deletion alleles with SNP haplotypes using Drop-Phase<sup>21</sup>.** The CNV was phased with nucleotide polymorphisms on either side of the CNV for each individual carrying a recent deletion allele. The numbers indicate the linkage statistic for each allele. The order in which the nucleotides are listed corresponds to the order of the numbers beneath each individual. For example, individual NA20502 has a linkage statistic of 105 with the A allele and 0 with the T allele at rs113811215.

| SNP \ Individual   | NA11843 | NA18502 | NA20502 | NA20786 |
|--------------------|---------|---------|---------|---------|
| rs113811215<br>A/T | NA      | N/A     | 105/0   | NA      |
| rs12917999<br>C/T  | 0/182   | NA      | NA      | 80/0    |
| rs34682685<br>A/G  | NA      | NA      | 0/139   | 160/0   |
| rs7189591<br>G/T   | 191/0   | NA      | NA      | 0/151   |
| rs138230207<br>A/G | NA      | 57/0    | NA      | NA      |

**Supplementary Table 14. Primer Sequences.** The hg19 genome build has the HP2FS subtype. If a given assay will amplify HP2FS sequence, the genomic coordinates of the amplicon are provided.

| Technology        | Assay               | Sequence (5' to 3')    | Targeted sequence (hg19 coordinates) |
|-------------------|---------------------|------------------------|--------------------------------------|
| Sanger sequencing | HPregion_F          | CCAGGGCCAAAGTTTGTAGA   | chr16:72088426-72095328              |
|                   | HPregion_R          | TCCTAATTCACTTTGAGGAGGC |                                      |
|                   | HPregion_F          | CCAGGGCCAAAGTTTGTAGA   | chr16:72088426-72089409              |
|                   | HPregion_int1_R     | TCTGCCAGTTCACCATCTCA   |                                      |
|                   | HP_FI1_F            | GCTTCCTGGCCTCCTGAGTA   | chr16:72088835-72089704              |
|                   | HP_FI1_R            | CCCTCCAGGAAAGAGAAACC   |                                      |
|                   | HPregion_int1_F     | AAGTAGTGCCCGAATGGTTG   | chr16:72089359-72090383              |
|                   | HPregion_int2int4_R | CCCAGTGAACCGTGAAAAGT   |                                      |
|                   | HP_FI2_F            | GAGCTGTCATTGCCCTCCT    | chr16:72090068-72091063              |
|                   | HP_FI2_R            | TCACAGCCAAGCAGTACAGG   |                                      |
|                   | HPregion_int2_F     | AGAAATGAGGGGAGCTTGC    | chr16:72090281-72091443              |
|                   | HPregion_int3int6_R | ACTGGAAGGCTGTGCCTCTA   |                                      |
|                   | HP_FI3_F            | GTCCTGGCACTGCTCTAAGG   | chr16:72090860-72091767              |
|                   | HP_FI3_R            | AACGAGAAGCAGGAGTTCCA   |                                      |
|                   | HPregion_int3int6_F | TCCTGAATGTGAAGCAGGTG   | chr16:72093071-72094116              |
|                   | HPregion_ex7_R      | TGGTGGGAAACCATCTTAGC   |                                      |

|                        |                     |                             |                 |
|------------------------|---------------------|-----------------------------|-----------------|
|                        | HP_FI4_F            | CCAGGGCTCAAAAATCTCAG        | chr16:72093750- |
|                        | HPregion_R          | TCCTAATTCACCTTTGAGGAGGC     | 72095328        |
|                        | HPregion_ex7_F      | ATCCTGGGTGGACACCTG          | chr16:72094052- |
|                        | HPregion_R          | TCCTAATTCACCTTTGAGGAGGC     | 72095328        |
|                        | HPregion_F          | CCAGGGCCAAAGTTTGTAGA        | chr16:72088426- |
|                        | HP2Left_R           | AATAGAAGCTCGCGAACTGTATTAT   | 72092042        |
|                        | HP2Right_F          | ATAATACAGTTCGCGAGCTTCTATT   | chr16:72092018- |
|                        | HPregion_R          | TCCTAATTCACCTTTGAGGAGGC     | 72095328        |
| droplet-digital<br>PCR | A_F                 | GAGCCCTCCCTGTACTGCT         | chr16:72091036- |
|                        | A_R                 | AAGCCAAGTGCCTGGACA          | 72091119        |
|                        | A_probe             | FAM-CCGCCATGACCACAGTGTGTTCC |                 |
|                        | B_F                 | TGCTGAGCACTGAGCACTTA        | HP1F only       |
|                        | B_R                 | TCCTAATCTGTGGGCGATGT        |                 |
|                        | B_probe             | FAM-CCAGTGCGGCTTCCTCTGAGC   |                 |
|                        | D_F                 | GGCTGAATCCACTGTCCG          | chr16:72091582- |
|                        | D_R                 | TCCATGGATTAAGATTTTATGTCATT  |                 |
|                        | D_probe             | FAM-TGCCACAGATCAGGAGAGCCTG  |                 |
|                        | E_F                 | TGGAAATTCCTTTATTGGGATAAT    | chr16:72091985- |
|                        | E_R                 | GCTGCTCTGCACATCAATCT        |                 |
|                        | E_probe             | FAM-CGCGAGCTTCTATTCGGGGTG   |                 |
|                        | control_RPP30_F     | GATTTGGACCTGCGAGCG          | chr10:92631759- |
|                        | control_RPP30_R     | GCGGCTGTCTCCACAAGT          |                 |
|                        | control_RPP30_probe | VIC-CTGACCTGAAGGCTCT        |                 |
|                        |                     |                             | 92631820        |

|     |                       |                          |                               |
|-----|-----------------------|--------------------------|-------------------------------|
|     | control_UCE_F         | GCTATAATAGAAGGGGGAAGTCG  | chr12:106976559<br>-106976654 |
|     | control_UCE_R         | ATTGTGGGCCTGTTTTGAAT     |                               |
|     | control_UCE_pr<br>obe | VIC-ATTGCGTCGCTCTGAGCCCC |                               |
| PCR | C_F                   | TCACTCTGCACGGGGTCT       | HP2SS only                    |
|     | C_R                   | TCTCCTGATCTGTGGGCAG      |                               |

**Supplementary Table 15. Population Identifiers.**

CEU Utah residents with Northern and  
Western European ancestry  
IBS Iberian population in Spain  
TSI Toscani in Italia  
YRI Yoruba in Ibadan, Nigeria



## **dbGaP Study Acknowledgements**

### **ARIC**

The Atherosclerosis Risk in Communities Study is carried out as a collaborative study supported by National Heart, Lung, and Blood Institute contracts (HHSN268201100005C, HHSN268201100006C, HHSN268201100007C, HHSN268201100008C, HHSN268201100009C, HHSN268201100010C, HHSN268201100011C, and HHSN268201100012C). Funding for GENEVA genotyping was provided by National Human Genome Research Institute grant U01HG004402 (E. Boerwinkle). This manuscript was not prepared in collaboration with investigators of the Atherosclerosis Risk in Communities Study and does not necessarily reflect the opinions or views of the Atherosclerosis Risk in Communities Study.

### **CARDIA**

The Coronary Artery Risk Development in Young Adults Study (CARDIA) is conducted and supported by the National Heart, Lung, and Blood Institute (NHLBI) in collaboration with the University of Alabama at Birmingham (N01-HC95095 & N01-HC48047), University of Minnesota (N01-HC48048), Northwestern University (N01-HC48049), and Kaiser Foundation Research Institute (N01-HC48050). Genotyping for the CARDIA GENEVA cohort was supported by grant U01 HG004729 from the National Human Genome Research Institute. This manuscript was not approved by CARDIA. The opinions and conclusions contained in this publication are solely those of the authors, and are not endorsed by CARDIA or the NHLBI and should not be assumed to reflect the opinions or conclusions of either CARDIA, or the NHLBI.

### **CHS**

The Cardiovascular Health Study (CHS) research reported in this article was supported by contract numbers N01-HC-85079, N01-HC-85080, N01-HC-85081, N01-HC-85082, N01-HC-85083, N01-HC-85084, N01-HC-85085, N01-HC-85086, N01-HC-35129, N01 HC-15103, N01 HC-55222, N01-HC-75150, N01-HC-45133, N01-HC-85239 and HHSN268201200036C; grant numbers U01 HL080295 from the National Heart, Lung, and Blood Institute and R01 AG-023629 from the National Institute on Aging, with additional contribution from the National Institute of Neurological Disorders and Stroke. A full list of principal CHS investigators and institutions can be found at <http://www.chs-nhlbi.org/pi.htm>. Support for the Cardiovascular Health Study Whole Genome Study was provided by NHLBI grant HL087652. Additional support for infrastructure was provided by HL105756 and additional genotyping among the African-American cohort was supported in part by HL085251. DNA handling and genotyping at Cedars-Sinai Medical Center was supported in part by National Center for Research Resources grant UL1RR033176, now at the National Center for Advancing Translational Technologies CTSI grant UL1TR000124; in addition to the National Institute of Diabetes and Digestive and Kidney Diseases grant DK063491 to the Southern California Diabetes Endocrinology Research Center. This manuscript

was not prepared in collaboration with CHS investigators and does not necessarily reflect the opinions or views of CHS, or the NHLBI.

### **FUSION**

The Finland-United States Investigation of NIDDM Genetics (FUSION) Study was conducted by the FUSION Study Investigators and supported by the National Institute of Diabetes and Digestive and Kidney Diseases (NIDDK). Genotyping for the FUSION study was supported by NIH HHSN268200782096C award. The data from the FUSION reported here were supplied by the dbGaP and NIDDK Central Repositories. This manuscript was not prepared in collaboration with Investigators of the FUSION study and does not necessarily reflect the opinions or views of the FUSION study, the NIDDK Central Repositories, or the NIDDK.

### **MESA**

The Multi-Ethnic Study of Atherosclerosis (MESA) and the MESA SHARe project are conducted and supported by the National Heart, Lung, and Blood Institute (NHLBI) in collaboration with MESA investigators. Support for MESA is provided by contracts N01-HC-95159, N01-HC-95160, N01-HC-95161, N01-HC-95162, N01-HC-95163, N01-HC-95164, N01-HC-95165, N01-HC-95166, N01-HC-95167, N01-HC-95168, N01-HC-95169 and CTSA UL1-RR-024156. Funding for SHARe genotyping was provided by NHLBI Contract N02-HL-64278. Genotyping was performed at Affymetrix (Santa Clara, California, USA) and the Broad Institute of Harvard and MIT (Boston, Massachusetts, USA) using the Affymetric Genome-Wide Human SNP Array 6.0. This manuscript was not prepared in collaboration with MESA investigators and does not necessarily reflect the opinions or views of MESA, or the NHLBI.

### **NFBC66**

The NFBC1966 Study is conducted and supported by the National Heart, Lung, and Blood Institute (NHLBI) in collaboration with the Broad Institute, UCLA, University of Oulu, and the National Institute for Health and Welfare in Finland. This manuscript was not prepared in collaboration with investigators of the NFBC1966 Study and does not necessarily reflect the opinions or views of the NFBC1966 Study Investigators, Broad Institute, UCLA, University of Oulu, National Institute for Health and Welfare in Finland and the NHLBI

## References

1. Hindson, B. J. *et al.* High-throughput droplet digital PCR system for absolute quantitation of DNA copy number. *Anal. Chem.* **83**, 8604–8610 (2011).
2. 1000 Genomes Project Consortium *et al.* An integrated map of genetic variation from 1,092 human genomes. *Nature* **491**, 56–65 (2012).
3. International HapMap Consortium *et al.* A second generation human haplotype map of over 3.1 million SNPs. *Nature* **449**, 851–861 (2007).
4. The Atherosclerosis Risk in Communities (ARIC) Study: design and objectives. The ARIC investigators. *Am. J. Epidemiol.* **129**, 687–702 (1989).
5. Korn, J. M. *et al.* Integrated genotype calling and association analysis of SNPs, common copy number polymorphisms and rare CNVs. *Nat Genet* **40**, 1253–1260 (2008).
6. Fried, L. P. *et al.* Risk factors for 5-year mortality in older adults: the Cardiovascular Health Study. *JAMA* **279**, 585–592 (1998).
7. Gardin, J. M. *et al.* Relationship of cardiovascular risk factors to echocardiographic left ventricular mass in healthy young black and white adult men and women. The CARDIA study. Coronary Artery Risk Development in Young Adults. *Circulation* **92**, 380–387 (1995).
8. Valle, T., Tuomilehto, J., Bergman, R. N. & Ghosh, S. Mapping Genes for NIDDM: Design of the Finland—United States Investigation of NIDDM Genetics (FUSION) Study. *Diabetes* (1998).
9. Bild, D. E., Bluemke, D. A. & Burke, G. L. Multi-ethnic study of atherosclerosis: objectives and design. *American journal of ...* (2002).
10. Järvelin, M. R., Sovio, U., King, V., Lauren, L. & Xu, B. Early life factors and blood pressure at age 31 years in the 1966 northern Finland birth cohort. ... (2004).
11. Dreszer, T. R. *et al.* The UCSC Genome Browser database: extensions and updates 2011. *Nucleic Acids Res* **40**, D918–23 (2012).
12. Price, A. L. *et al.* Principal components analysis corrects for stratification in genome-wide association studies. *Nat Genet* **38**, 904–909 (2006).
13. International HapMap Consortium. A haplotype map of the human genome. *Nature* **437**, 1299–1320 (2005).
14. Purcell, S. *et al.* PLINK: a tool set for whole-genome association and population-based linkage analyses. *Am. J. Hum. Genet.* **81**, 559–575 (2007).
15. Delaneau, O., Zagury, J.-F. & Marchini, J. Improved whole-chromosome phasing for disease and population genetic studies. *Nat. Methods* **10**, 5–6 (2013).
16. Howie, B., Fuchsberger, C., Stephens, M., Marchini, J. & Abecasis, G. R. Fast and accurate genotype imputation in genome-wide association studies through pre-phasing. *Nat Genet* **44**, 955–959 (2012).
17. Willer, C. J., Li, Y. & Abecasis, G. R. METAL: fast and efficient meta-analysis of genomewide association scans. *Bioinformatics* **26**, 2190–2191

- (2010).
18. Prüfer, K. *et al.* The complete genome sequence of a Neanderthal from the Altai Mountains. *Nature* **505**, 43–49 (2014).
  19. Meyer, M., Kircher, M., Gansauge, M. T., Li, H. & Racimo, F. A high-coverage genome sequence from an archaic Denisovan individual. *Science* (2012).
  20. Llorente, M. G. *et al.* Ancient Ethiopian genome reveals extensive Eurasian admixture throughout the African continent. *Science* (2015).  
doi:10.1126/science.aad2879
  21. Regan, J. F. *et al.* A rapid molecular approach for chromosomal phasing. *PLoS ONE* **10**, e0118270 (2015).
